# Supplementary material for: Proteomic and functional analyses in disease models reveal CLN5 protein involvement in mitochondrial dysfunction
Source: PubMed Central journal article supplement (PMC7105465; doi:10.1038/s41420-020-0250-y), 2020-03-30
Supplement: 41420_2020_250_MOESM10_ESM.pdf [file 41420_2020_250_MOESM10_ESM.pdf]

# DECLARATION OF CONTRIBUTIONS TO ARTICLE

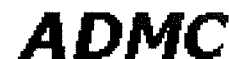

Manuscript Number:

CDDISCOVERY-20-0841-T

Journal Name:

*Cell Death Discovery*

(the 'Journal')

Proposed Title of the Contribution:

Proteomic and functional analyses in disease models reveal CLN5 protein involvement in mitochondrial dysfunction

(the 'Contribution')

Author(s):

Stefano Doccini, Federica Morani, Claudia Nesti, Francesco Pezzini, Giulio Calza, Rabah Soliymani, Giovanni Signore, Silvia Rocchiccioli, Katja M. Kanninen, Mikko T. Huuskonen, Marc Baumann, Alessandro Simonati, Maciej Lalowski, Filippo M. Santorelli

(the 'Authors')

For all *CDDiscovery* articles, each person named as an author in the published version must be able to show he or she has contributed substantially to the article.

Authorship credit should be based on 1) substantial contributions to conception and design, acquisition of data, or analysis and interpretation of data; 2) drafting the article or revising it critically for important intellectual content; and 3) final approval of the version to be published. Authors should meet conditions 1, 2 and 3.

Any person who cannot be shown to have made a substantial contribution to the article cannot be listed as an author in the final version. The name of any person who is deemed to have made a minor contribution can, however, appear in the Acknowledgments section of the article.

Please complete the table below to indicate the contributions of all named authors to the manuscript.

| Author Full Name:                                   | Specification of Contribution to the Manuscript:                                                                                                                                              |
|-----------------------------------------------------|-----------------------------------------------------------------------------------------------------------------------------------------------------------------------------------------------|
| Stefano Doccini                                     | conception and design, acquisition of data, analysis and interpretation of data; drafting the article, revising it critically for important intellectual content; final approval of the paper |
| Federica Morani                                     | acquisition of data, analysis and interpretation of data; revising the article critically for important intellectual content; final approval of the paper                                     |
| Claudia Nesti                                       | acquisition of data, analysis and interpretation of data; revising the article critically for important intellectual content; final approval of the paper                                     |
| Francesco Pezzini                                   | acquisition of data, analysis and interpretation of data; revising the article; final approval of the paper                                                                                   |
| Giulio Calza                                        | acquisition of data, analysis and interpretation of data; revising the article; final approval of the paper                                                                                   |
| Rabah Soliymani                                     | acquisition of data, analysis and interpretation of data; revising the article; final approval of the paper                                                                                   |
| Giovanni Signore                                    | acquisition of data, analysis and interpretation of data; revising the article; final approval of the paper                                                                                   |
| Silvia Rocchiccioli                                 | acquisition of data, analysis and interpretation of data; revising the article; final approval of the paper                                                                                   |
| Katja M. Kanninen                                   | analysis and interpretation of data; revising the article; final approval of the paper                                                                                                        |
| Mikko T. Huuskonen                                  | analysis and interpretation of data; revising the article; final approval of the paper                                                                                                        |
| Marc Baumann                                        | analysis and interpretation of data; revising the article; final approval of the paper                                                                                                        |
| Alessandro Simonati, Maciej Lalowski, FM Santorelli | conception and design, interpretation of data; revising the article for important intellectual content; final approval of the paper                                                           |
|                                                     |                                                                                                                                                                                               |

Please complete the table below to indicate the contributions of all named authors to the figures.

Figure 1:

Contribution: all

Figure 2:

Contribution: all

Figure 3:

Contribution: all

Figure 4:

Contribution: all

Figure 5:

Contribution: all

Figure 6:

Contribution: all

Signed for and on behalf of the Author(s):

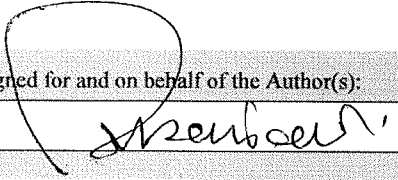

Print Name:

FILIPPO M. SANTORELLI

Date:

23-01-2020
